# Supplementary material for: Experimental and computational evidence for stabilising parallel, offset π[C(O)N(H)NC]⋯π(phenyl) interactions in acetohydrazide derivatives
Source: Royal Society of Chemistry journal article supplement (doi:10.1039/d1ce01492g), 2021-12-10
Supplement: d1ce01492g1.pdf [file d1ce01492g1.pdf]

## Experimental and computational evidence for stabilising parallel, off-set $\pi[C(=O)N(H)N=C]\cdots\pi(\text{phenyl})$ interactions in acetohydrazide derivatives†

Sang Loon Tan,<sup>a</sup> Laura N. F. Cardoso,<sup>b</sup> Marcus V. N. de Souza,<sup>b</sup> Solange M. S. V. Wardell,<sup>c</sup>  
James L. Wardell<sup>\*d</sup> and Edward R. T. Tiekink<sup>\*a</sup>

<sup>a</sup> Research Centre for Crystalline Materials, School of Medical and Life Sciences, Sunway University, 47500 Bandar Sunway, Selangor Darul Ehsan, Malaysia

<sup>b</sup> Instituto de Tecnologia em Fármacos Farmanguinhos, FIOCRUZ Fundação Oswaldo Cruz, Rio de Janeiro 21041–250, Brazil

<sup>c</sup> CHEMSOL, 1 Harcourt Road, Aberdeen, AB15 5NY, Scotland, UK

<sup>d</sup> Department of Chemistry, University of Aberdeen, Meston Walk, Old Aberdeen, AB24 3UE, Scotland, UK

E-mail: [j.wardell@abdn.ac.uk](mailto:j.wardell@abdn.ac.uk) (JLW); [edwardt@sunway.edu.my](mailto:edwardt@sunway.edu.my) (ERTT)

### TABLE OF CONTENTS

**ESI Figure 1.** The HRMS spectrum measured for N'-[(1*E*)-phenylmethylidene]-2-(thiophen-2-yl)acetohydrazide (**1**).

**ESI Table 1.** Compilation of literature structures featuring  $\pi[C(=O)N(H)N=C]\cdots\pi(\text{phenyl})$  interactions in acetohydrazide derivatives – *syn*-amides

**ESI Table 2.** Compilation of literature structures featuring  $\pi[C(=O)N(H)N=C]\cdots\pi(\text{phenyl})$  interactions in acetohydrazide derivatives – *anti*-amides

# Compound Spectrum SmartFormula Report

## Analysis Info

Analysis Name D:\Data\2021\SINTESE 2\INFUSAO\4474 - PTIO 24.d  
Method Tune\_pos\_Standard.m  
Sample Name 4474 - PTIO 24  
Comment

Acquisition Date 12/1/2021 10:15:14 AM  
Operator Vinicius  
Instrument compact 8255754.10035

## Acquisition Parameter

|             |            |                      |          |                  |           |
|-------------|------------|----------------------|----------|------------------|-----------|
| Source Type | ESI        | Ion Polarity         | Positive | Set Nebulizer    | 0.4 Bar   |
| Focus       | Not active | Set Capillary        | 4000 V   | Set Dry Heater   | 200 °C    |
| Scan Begin  | 100 m/z    | Set End Plate Offset | -400 V   | Set Dry Gas      | 4.0 l/min |
| Scan End    | 1000 m/z   | Set Charging Voltage | 2000 V   | Set Divert Valve | Source    |
|             |            | Set Corona           | 0 nA     | Set APCI Heater  | 0 °C      |

## +MS, 0.2-0.5min #11-31

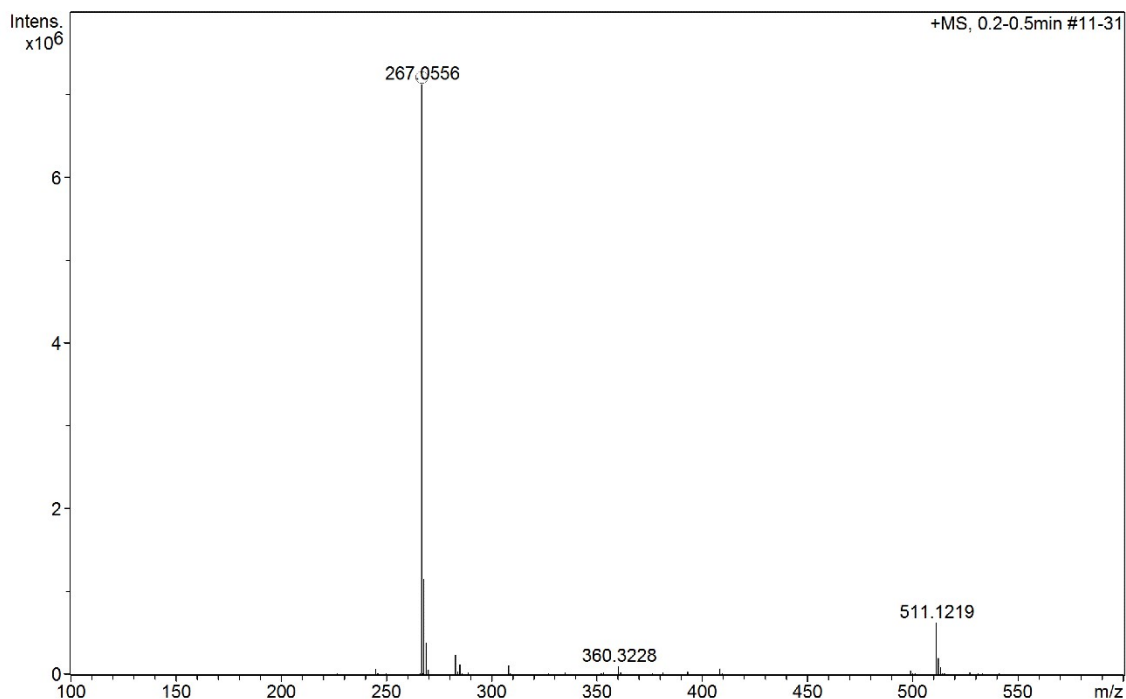

| Meas. m/z # Ion Formula                                          | m/z err [ppm] | Mean err rdb [ppm] | N-Rule | e <sup>-</sup> Conf | mSigma | Std I | Std | Mean m/z | Std I | VarNorm | Std m/z | Diff | Std Comb Dev |
|------------------------------------------------------------------|---------------|--------------------|--------|---------------------|--------|-------|-----|----------|-------|---------|---------|------|--------------|
| 267.055634 1 C <sub>13</sub> H <sub>12</sub> N <sub>2</sub> NaOS | 267.056255    | 2.3                | 2.4    | 8.5                 | ok     | even  | 3.1 | 5.0      | n.a.  | n.a.    | n.a.    | n.a. | n.a.         |

4474 - PTIO 24.d

Bruker Compass DataAnalysis 4.2

printed: 12/1/2021 10:16:55 AM

by: Vinicius

Page 1 of 1

**ESI Figure 1.** The HRMS spectrum measured for N'-[(1*E*)-phenylmethylidene]-2-(thiophen-2-yl)acetohydrazide (**1**).

**ESI Table 1.** Compilation of literature structures featuring  $\pi[\text{C}(\text{=O})\text{N}(\text{H})\text{N}=\text{C}] \cdots \pi(\text{phenyl})$  interactions in acetohydrazide derivatives – *syn*-amides. Within each supramolecular aggregation pattern, aggregates are ordered in terms of REFCODE.

**Centrosymmetric dimer:**

**s1. GIRPON** phthalazin-1(2H)-one picric acid (1/1)

H. S. Yathirajan, B. Narayana, M. T. Swamy, B. K. Sarojini and M. Bolte, *Acta Crystallogr., Sect. E: Cryst. Commun.*, 2008, **64**, o119, <https://doi.org/10.1107/S1600536807063362>

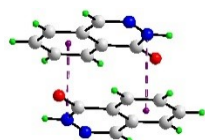

$d(\text{HN} \cdots \text{Cg}) = 3.36 \text{ \AA}$ ;  $\text{C} \cdots \text{C} = 3.30 \text{ \AA}$ ;  $\text{N} \cdots \text{C} = 3.39 \text{ \AA}$ ; dihedral angle  $\text{C}_2\text{N}_2\text{O}/\text{C}_6 = 2.2^\circ$ ;  
sum of angles about N(H) =  $359.9^\circ$

**s2. WODXIZ** N'-[(4-methoxyphenyl)methylidene]-2-(5-phenyl-2H-tetrazol-2-yl)acetohydrazide

M. M. Naseer, M. Hussain, A. Bauzá, K. M. Lo and A. Frontera, *ChemPlusChem*, 2018, **83**, 881-885, <https://doi.org/10.1002/cplu.201800329>

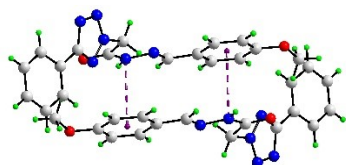

$d(\text{HN} \cdots \text{Cg}) = 3.40 \text{ \AA}$ ;  $\text{C} \cdots \text{C} = 3.35 \text{ \AA}$ ;  $\text{N} \cdots \text{C} = 3.49 \text{ \AA}$ ; dihedral angle  $\text{C}_2\text{N}_2\text{O}/\text{C}_6 = 3.6^\circ$ ;  
sum of angles about N(H) =  $360.0^\circ$

**Linear chain:**

**s3. BOWQIP** N'-(2,3-dihydroxybenzylidene)acetohydrazide

D. Sadhukhan, M. Maiti, G. Pilet, A. Bauzá, A. Frontera and S. Mitra, *Eur. J. Inorg. Chem.*, 2015, 1958-1972, <https://doi.org/10.1002/ejic.201500030>

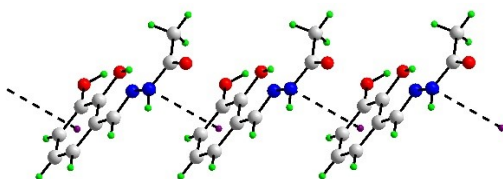

$d(\text{HN} \cdots \text{Cg}) = 3.33 \text{ \AA}$ ;  $\text{C} \cdots \text{C} = 3.40 \text{ \AA}$ ;  $\text{N} \cdots \text{C} = 3.34 \text{ \AA}$ ; dihedral angle  $\text{C}_2\text{N}_2\text{O}/\text{C}_6 = 7.1^\circ$ ;  
sum of angles about N(H) =  $359.4^\circ$

**s4. IPUWOG** t-butyl (3-hydroxy-1-(2-(2-nitrobenzylidene)hydrazino)-1-oxopropan-2-yl)carbamate

R. A. Howie, M. V. N. de Souza, A. Pinheiro, C. R. Kaiser, J. L. Wardell and S. M. S. V. Wardell, *Z.*

*Kristallogr. Cryst. Mater.*, 2011, **226**, 483-491, <https://doi.org/10.1524/zkri.2011.1359>

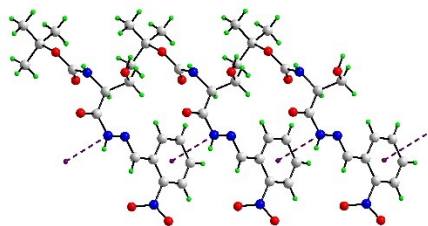

$d(\text{HN}\cdots\text{Cg}) = 3.45 \text{ \AA}$ ;  $\text{C}\cdots\text{C} = 3.34 \text{ \AA}$ ;  $\text{N}\cdots\text{C} = 3.39 \text{ \AA}$ ; dihedral angle  $\text{C}_2\text{N}_2\text{O}/\text{C}_6 = 3.6^\circ$ ;

sum of angles about  $\text{N}(\text{H}) = 358.2^\circ$

**s5. LOHTUA** N'-[(4-methoxyphenyl)methylidene]-2-(thiophen-3-yl)acetohydrazide

T. Vu Quoc, L. Nguyen Ngoc, D. Tran Thi Thuy, M. Vu Quoc, T. Vuong Nguyen, Y. Oanh Doan Thi

and L. Van Meervelt, *Acta Crystallogr., Sect. E: Cryst. Commun.*, 2019, **75**, 1090-1095,

<https://doi.org/10.1107/S2056989019008892>

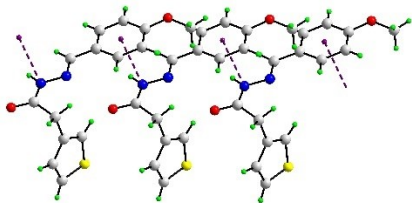

$d(\text{HN}\cdots\text{Cg}) = 3.43 \text{ \AA}$ ;  $\text{C}\cdots\text{C} = 3.50 \text{ \AA}$ ;  $\text{N}\cdots\text{C} = 3.48 \text{ \AA}$ ; dihedral angle  $\text{C}_2\text{N}_2\text{O}/\text{C}_6 = 9.1^\circ$ ;

sum of angles about  $\text{N}(\text{H}) = 360.0^\circ$

**s6. PECVEA** (E)-N'-(4-methoxybenzylidene)-2-m-tolylacetohydrazide

A. S. Praveen, J. P. Jasinski, A. C. Keeley, H. S. Yathirajan and B. Narayana, *Acta Crystallogr., Sect. E:*

*Cryst. Commun.*, 2012, **68**, o3435, <https://doi.org/10.1107/S1600536812047113>

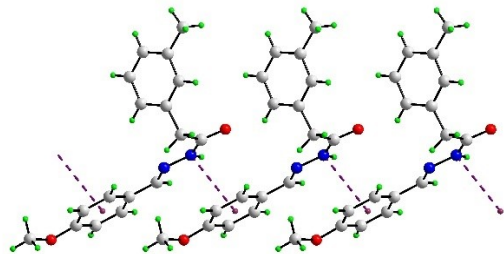

$d(\text{HN}\cdots\text{Cg}) = 3.43 \text{ \AA}$ ;  $\text{C}\cdots\text{C} = 3.40 \text{ \AA}$ ;  $\text{N}\cdots\text{C} = 3.46 \text{ \AA}$ ; dihedral angle  $\text{C}_2\text{N}_2\text{O}/\text{C}_6 = 4.4^\circ$ ;

sum of angles about  $\text{N}(\text{H}) = 360.0^\circ$

**ESI Table 2.** Compilation of literature structures featuring  $\pi[C(=O)N(H)N=C]\cdots\pi(\text{phenyl})$  interactions in acetohydrazide derivatives – *anti*-amides. Within each supramolecular aggregation pattern, aggregates are ordered in terms of REFCODE.

**Non-symmetric two-molecule aggregates:**

**a1. CEGFAX** N'-(4-hydroxybenzylidene)-2-(2-naphthyloxy)acetohydrazide

R. Kant, V. K. Gupta, K. Kapoor, S. Samshuddin, B. Narayana and B. K. Sarojini, *Acta Crystallogr., Sect. E: Cryst. Commun.*, 2012, **68**, o2923-o2924, <https://doi.org/10.1107/S1600536812038408>

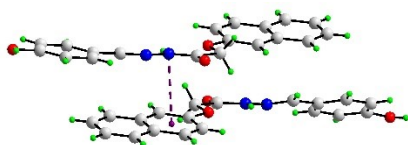

Two independent molecules which associate via a single interaction

$d(\text{HN}\cdots\text{Cg}) = 3.43 \text{ \AA}$ ;  $\text{C}\cdots\text{C} = 3.67 \text{ \AA}$ ;  $\text{N}\cdots\text{C} = 3.59 \text{ \AA}$ ; dihedral angle  $\text{C}_2\text{N}_2\text{O}/\text{C}_6 = 11.8^\circ$ ;

sum of angles about N(H) =  $360.0^\circ$

**a2. BACBOZ** N'-(3,5-bis((benzoylhydrazono)methyl)-2,4,6-trihydroxybenzylidene)benzohydrazide methanol solvate

J. S. Foster, J. M. Żurek, N. M. S. Almeida, W. E. Hendriksen, V. A. A. le Sage, V. Lakshminarayanan, A. L. Thompson, R. Banerjee, R. Eelkema, H. Mulvana, M. J. Paterson, J. H. van Esch and G. O. Lloyd, *J. Am. Chem. Soc.*, 2015, **137**, 14236-14239, <https://doi.org/10.1021/jacs.5b06988>

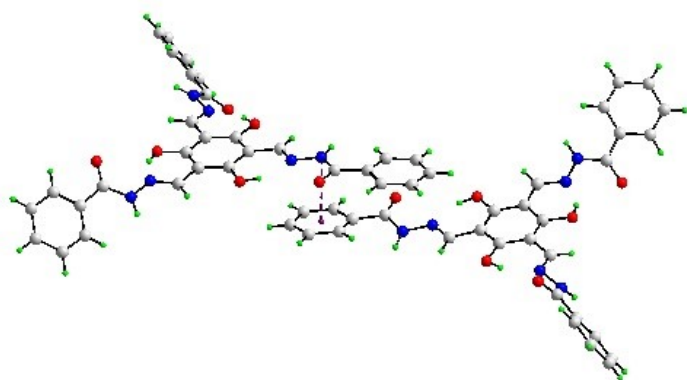

Non-symmetric dimer formed by two independent molecules

$d(\text{HN}\cdots\text{Cg}) = 3.37 \text{ \AA}$ ;  $\text{C}\cdots\text{C} = 3.28 \text{ \AA}$ ;  $\text{N}\cdots\text{C} = 3.25 \text{ \AA}$ ; dihedral angle  $\text{C}_2\text{N}_2\text{O}/\text{C}_6 = 5.3^\circ$ ;

sum of angles about N(H) =  $360.0^\circ$

### Centrosymmetric dimeric aggregates:

#### a3. AQEMIT N'-(3,5-dichloro-2-hydroxybenzylidene)isonicotinohydrazide

J. Xu, Y.-Q. Shu and P. Hu, *Z. Kristallogr. - New Cryst. Struct.*, 2011, **226**, 63-64,

<https://doi.org/10.1524/ncrs.2011.0031>

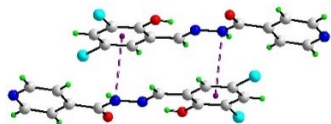

$d(\text{HN}\cdots\text{Cg}) = 3.40 \text{ \AA}$ ;  $\text{C}\cdots\text{C} = 3.34 \text{ \AA}$ ;  $\text{N}\cdots\text{C} = 3.39 \text{ \AA}$ ; dihedral angle  $\text{C}_2\text{N}_2\text{O}/\text{C}_6 = 0.8^\circ$ ;

sum of angles about N(H) =  $360.0^\circ$

#### a4. CABXAH 4-(dimethylamino)-N'-(2-hydroxy-5-methylbenzylidene)benzohydrazide

X.-F. Meng, W.-N. Li and J.-J. Ma, *J. Chil. Chem. Soc.*, 2014, **59**, 2647-2651, [https://doi.org/10.4067/S0717-](https://doi.org/10.4067/S0717-97072014000400004)

[97072014000400004](https://doi.org/10.4067/S0717-97072014000400004)

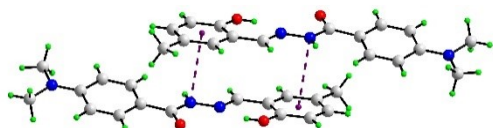

Two independent molecules: only one forms the interaction

$d(\text{HN}\cdots\text{Cg}) = 3.43 \text{ \AA}$ ;  $\text{C}\cdots\text{C} = 3.54 \text{ \AA}$ ;  $\text{N}\cdots\text{C} = 3.44 \text{ \AA}$ ; dihedral angle  $\text{C}_2\text{N}_2\text{O}/\text{C}_6 = 7.2^\circ$ ;

sum of angles about N(H) =  $360.0^\circ$

#### a5. CASQUJ N'-(4-hydroxybenzylidene)isonicotinohydrazide

Q.-L. Deng, M. Yu, X. Chen, C.-H. Diao, Z.-L. Jing and Z. Fan, *Acta Crystallogr., Sect. E: Cryst.*

*Commun.*, 2005, **61**, o2545-o2546, <https://doi.org/10.1107/S1600536805022191>

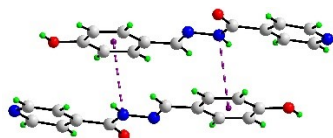

$d(\text{HN}\cdots\text{Cg}) = 3.45 \text{ \AA}$ ;  $\text{C}\cdots\text{C} = 3.47 \text{ \AA}$ ;  $\text{N}\cdots\text{C} = 3.51 \text{ \AA}$ ; dihedral angle  $\text{C}_2\text{N}_2\text{O}/\text{C}_6 = 3.8^\circ$ ;

sum of angles about N(H) =  $359.9^\circ$

#### a6. CEDRUA (E)-N'-(2,3,4-trihydroxybenzylidene)isonicotinohydrazide dihydrate

H. S. Naveenkumar, A. Sadikun, P. Ibrahim, J. H. Goh and H.-K. Fun, *Acta Crystallogr., Sect. E: Cryst.*

*Commun.*, 2010, **66**, o3017-o3018, <https://doi.org/10.1107/S1600536810043965>

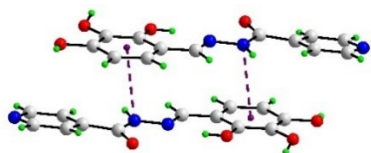

$d(\text{HN}\cdots\text{Cg}) = 3.37 \text{ \AA}$ ;  $\text{C}\cdots\text{C} = 3.41 \text{ \AA}$ ;  $\text{N}\cdots\text{C} = 3.38 \text{ \AA}$ ; dihedral angle  $\text{C}_2\text{N}_2\text{O}/\text{C}_6 = 5.5^\circ$ ;  
sum of angles about  $\text{N}(\text{H}) = 359.8^\circ$

**a7. FECQEM**  $\text{N}'\text{-}[(3\text{-fluoro-2-hydroxyphenyl)methylidene}]$ pyridine-4-carbohydrazide

S. Jiajaroen, K. Chainok and F. Kielar, *Acta Crystallogr., Sect. E: Cryst. Commun.*, 2017, **73**, 1151-1153,

<https://doi.org/10.1107/S2056989017009926>

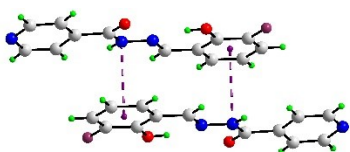

$d(\text{HN}\cdots\text{Cg}) = 3.40 \text{ \AA}$ ;  $\text{C}\cdots\text{C} = 3.35 \text{ \AA}$ ;  $\text{N}\cdots\text{C} = 3.40 \text{ \AA}$ ; dihedral angle  $\text{C}_2\text{N}_2\text{O}/\text{C}_6 = 1.8^\circ$ ;  
sum of angles about  $\text{N}(\text{H}) = 360.0^\circ$

**a8. FIXQOU** (*E*)- $\text{N}'\text{-}[(2\text{-hydroxynaphthalen-1-yl)methylene}]$ -2-(quinolin-8-yloxy)acetohydrazide sesquihydrate

S. Goswami, A. K. Das, K. Aich, A. Manna, H.-K. Fun and C. K. Quah, *Supramol. Chem.*, 2014, **26**, 94-

104, <https://doi.org/10.1080/10610278.2013.826805>

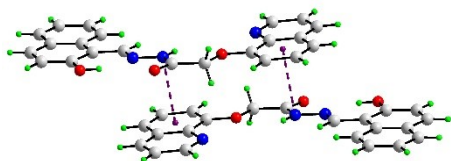

Four independent organic molecules; one associates about a centre of inversion

$d(\text{HN}\cdots\text{Cg}) = 3.31 \text{ \AA}$ ;  $\text{C}\cdots\text{C} = 3.42 \text{ \AA}$ ;  $\text{N}\cdots\text{C} = 3.36 \text{ \AA}$ ; dihedral angle  $\text{C}_2\text{N}_2\text{O}/\text{C}_6 = 6.7^\circ$ ;  
sum of angles about  $\text{N}(\text{H}) = 360.0^\circ$

**a9. FURCUT**  $\text{N}'\text{-}[(2\text{-hydroxyphenyl)methylidene}]$ -4-methylbenzohydrazide

S. Ta, M. Ghosh, N. Salam, J. Das, M. Islam, P. Brandão, V. Félix, J. Sanmartin and D. Das, *Appl.*

*Organomet. Chem.*, 2020, **24**, e5823, <https://doi.org/10.1002/aoc.5823>

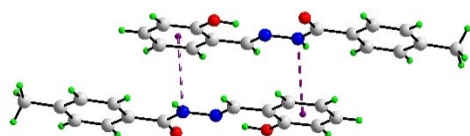

Two independent organic molecules; one associates about a centre of inversion

$d(\text{HN}\cdots\text{Cg}) = 3.29 \text{ \AA}$ ;  $\text{C}\cdots\text{C} = 3.35 \text{ \AA}$ ;  $\text{N}\cdots\text{C} = 3.28 \text{ \AA}$ ; dihedral angle  $\text{C}_2\text{N}_2\text{O}/\text{C}_6 = 2.3^\circ$ ;  
sum of angles about  $\text{N}(\text{H}) = 359.9^\circ$

**a10. GIGQUJ** N-((3,5-dibromo-2-hydroxyphenyl)methylene)-2-hydroxybenzohydrazide methanol solvate

N. Wang, J.-P. Li and Y.-L. Pu, *Chin. J. Struct. Chem.*, 2007, **26**, 547-550.

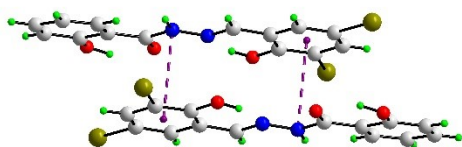

$d(\text{HN}\cdots\text{Cg}) = 3.41 \text{ \AA}$ ;  $\text{C}\cdots\text{C} = 3.43 \text{ \AA}$ ;  $\text{N}\cdots\text{C} = 3.40 \text{ \AA}$ ; dihedral angle  $\text{C}_2\text{N}_2\text{O}/\text{C}_6 = 1.7^\circ$ ;  
sum of angles about  $\text{N}(\text{H}) = 359.8^\circ$

**a11. GITBER** N'-(4-(dimethylamino)benzylidene)-3-hydroxybenzohydrazide

Y. Nie, *Acta Crystallogr., Sect. E: Struct. Cryst. Commun.*, 2008, **64**, o471,

<https://doi.org/10.1107/S160053680800130X>

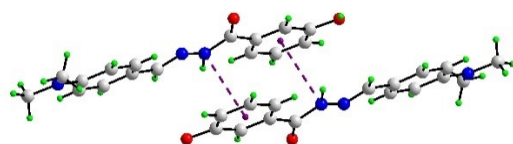

$d(\text{HN}\cdots\text{Cg}) = 3.40 \text{ \AA}$ ;  $\text{C}\cdots\text{C} = 3.71 \text{ \AA}$ ;  $\text{N}\cdots\text{C} = 3.27 \text{ \AA}$ ; dihedral angle  $\text{C}_2\text{N}_2\text{O}/\text{C}_6 = 15.4^\circ$ ;  
sum of angles about  $\text{N}(\text{H}) = 358.6^\circ$

**a12. GOQLIK** N'-((1E,2E)-4-(7-methoxy-2-oxo-2H-chromen-8-yl)-2-methylbut-2-en-1-ylidene)-3-methylbenzohydrazide

X. Yu, Y.-F. Zhao, Y. Qin, J. Yan and Y.-F. Chen, *Z. Kristallogr.-New Cryst. Struct.*, 2019, **234**, 1039-1041,

<https://doi.org/10.1515/ncrs-2019-0249>

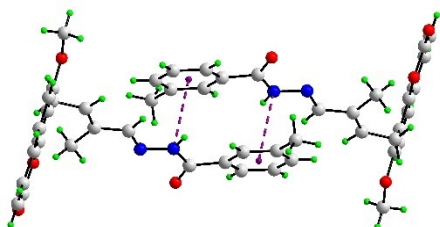

Two independent molecules: one self-associates about a centre of inversion

$d(\text{HN}\cdots\text{Cg}) = 3.45 \text{ \AA}$ ;  $\text{C}\cdots\text{C} = 3.83 \text{ \AA}$ ;  $\text{N}\cdots\text{C} = 3.43 \text{ \AA}$ ; dihedral angle  $\text{C}_2\text{N}_2\text{O}/\text{C}_6 = 20.6^\circ$ ;  
sum of angles about  $\text{N}(\text{H}) = 360.0^\circ$



**a13. HUCSOO** (E)-3-bromo-N'-(4-methoxybenzylidene)benzohydrazide methanol solvate

G.-B. Cao, *Acta Crystallogr., Sect. E: Cryst. Commun.*, 2009, **65**, o2086,

<https://doi.org/10.1107/S1600536809030219>

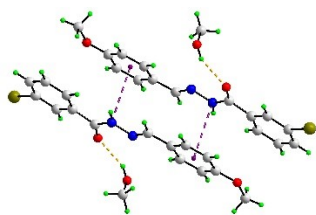

$d(\text{HN}\cdots\text{Cg}) = 3.44 \text{ \AA}$ ;  $\text{C}\cdots\text{C} = 3.61 \text{ \AA}$ ;  $\text{N}\cdots\text{C} = 3.46 \text{ \AA}$ ; dihedral angle  $\text{C}_2\text{N}_2\text{O}/\text{C}_6 = 9.9^\circ$ ;

sum of angles about N(H) =  $359.8^\circ$

**a14. IJUXIV** 3-chloro-N'-(4-(diethylamino)-2-hydroxybenzylidene)benzohydrazide

T.-Y. Li and B.-B. Li, *Acta Crystallogr., Sect. E: Cryst. Commun.*, 2011, **67**, o383,

<https://doi.org/10.1107/S1600536811001218>

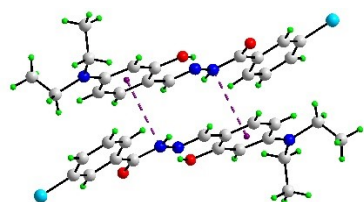

Two independent molecules: one self-associates about a centre of inversion

$d(\text{HN}\cdots\text{Cg}) = 3.39 \text{ \AA}$ ;  $\text{C}\cdots\text{C} = 3.58 \text{ \AA}$ ;  $\text{N}\cdots\text{C} = 3.31 \text{ \AA}$ ; dihedral angle  $\text{C}_2\text{N}_2\text{O}/\text{C}_6 = 5.0^\circ$ ;

sum of angles about N(H) =  $360.0^\circ$

**a15. JOLDOF** N'1,N'3-bis(2,3-dihydroxybenzylidene)isophthalohydrazide

S. Sharma, M. S. Hundal, A. Walia, V. Vanita and G. Hundal, *Org. Biomol. Chem.*, 2014, **12**, 4445-4453,

<https://doi.org/10.1039/C4OB00329B>

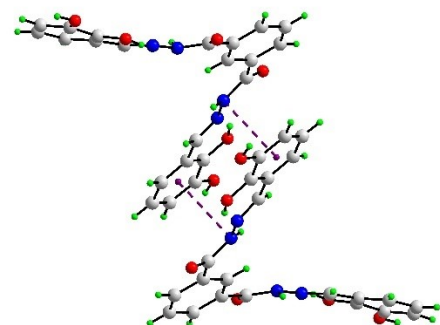

$d(\text{HN}\cdots\text{Cg}) = 3.37 \text{ \AA}$ ;  $\text{C}\cdots\text{C} = 3.46 \text{ \AA}$ ;  $\text{N}\cdots\text{C} = 3.45 \text{ \AA}$ ; dihedral angle  $\text{C}_2\text{N}_2\text{O}/\text{C}_6 = 5.5^\circ$ ;

sum of angles about N(H) =  $359.5^\circ$

**a16. KAVSEF** 2-hydroxyl-1-naphthaldehyde isonicotinoyl hydrazone

D. R. Richardson and P. V. Bernhardt, *J. Biol. Inorg. Chem.*, 1999, **4**, 266-273,

<https://doi.org/10.1007/s007750050312>

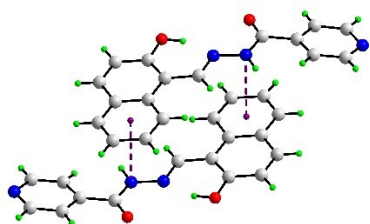

$d(\text{HN}\cdots\text{Cg}) = 3.39 \text{ \AA}$ ;  $\text{C}\cdots\text{C} = 3.29 \text{ \AA}$ ;  $\text{N}\cdots\text{C} = 3.45 \text{ \AA}$ ; dihedral angle  $\text{C}_2\text{N}_2\text{O}/\text{C}_6 = 2.2^\circ$ ;

sum of angles about N(H) =  $359.8^\circ$

**a17. LOPHAB** 2-[(8-hydroxyquinolinyl)methylene]acetohydrazide

L. M. F. Gomes, R. P. Vieira, M. R. Jones, M. C. P. Wang, C. Dyrager, E. M. Souza-Fagundes, J. G. Da Silva, T. Storr and H. Beraldo, *J. Inorg. Biochem.*, 2014, **139**, 106-116,

<https://doi.org/10.1016/j.jinorgbio.2014.04.011>

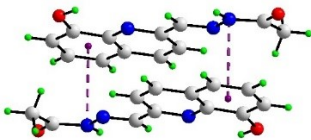

Two independent molecules: one self-associates about a centre of inversion

$d(\text{HN}\cdots\text{Cg}) = 3.29 \text{ \AA}$ ;  $\text{C}\cdots\text{C} = 3.36 \text{ \AA}$ ;  $\text{N}\cdots\text{C} = 3.34 \text{ \AA}$ ; dihedral angle  $\text{C}_2\text{N}_2\text{O}/\text{C}_6 = 5.2^\circ$ ;

sum of angles about N(H) =  $360.0^\circ$

**a18. LUTWUU** N'-(3,5-dichloro-2-hydroxybenzylidene)-4-nitrobenzohydrazide N,N-dimethylformamide solvate

B. Joseph, N. R. Sajitha, M. Sithambaresan, E. B. Seenaa and M. R. P. Kurup, *Acta Crystallogr., Sect. E: Cryst. Commun.*, 2015, **71**, o826-o827, <https://doi.org/10.1107/S2056989015018290>

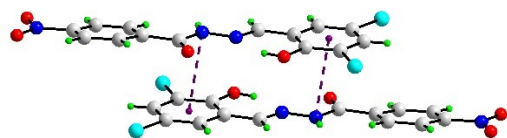

$d(\text{HN}\cdots\text{Cg}) = 3.42 \text{ \AA}$ ;  $\text{C}\cdots\text{C} = 3.43 \text{ \AA}$ ;  $\text{N}\cdots\text{C} = 3.39 \text{ \AA}$ ; dihedral angle  $\text{C}_2\text{N}_2\text{O}/\text{C}_6 = 1.7^\circ$ ;

sum of angles about N(H) =  $359.9^\circ$

**a19. MIXWUM** N'-(3-ethoxy-2-hydroxybenzylidene)-3-hydroxynaphthalene-2-carbohydrazide

J.-T. Lei, Y.-X. Jiang, L.-Y. Tao, S.-S. Huang and H.-L. Zhang, *Acta Crystallogr., Sect. E: Cryst. Commun.*, 2008, **64**, o909, <https://doi.org/10.1107/S1600536808010933>

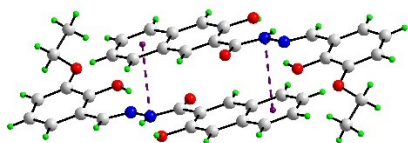

$d(\text{HN}\cdots\text{Cg}) = 3.36 \text{ \AA}$ ;  $\text{C}\cdots\text{C} = 3.49 \text{ \AA}$ ;  $\text{N}\cdots\text{C} = 3.36 \text{ \AA}$ ; dihedral angle  $\text{C}_2\text{N}_2\text{O}/\text{C}_6 = 7.8^\circ$ ;  
sum of angles about N(H) =  $359.9^\circ$

**a20. MODQOM** N'-(3-ethoxy-2-hydroxybenzylidene)-3-hydroxynaphthalene-2-carbohydrazide methanol solvate

W. A. Yehye, A. Ariffin and S. W. Ng, *Acta Crystallogr., Sect. E: Cryst. Commun.*, 2008, **64**, o1452, <https://doi.org/10.1107/S1600536808020746>

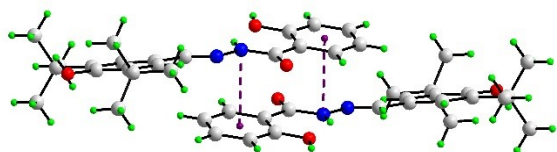

Two independent molecules: only one self-associates about a centre of inversion  
 $d(\text{HN}\cdots\text{Cg}) = 3.34 \text{ \AA}$ ;  $\text{C}\cdots\text{C} = 3.39 \text{ \AA}$ ;  $\text{N}\cdots\text{C} = 3.40 \text{ \AA}$ ; dihedral angle  $\text{C}_2\text{N}_2\text{O}/\text{C}_6 = 4.4^\circ$ ;  
sum of angles about N(H) =  $360.0^\circ$

**a21. MOKRUA** (E)-4-hydroxy-N'-(2-hydroxy-4-methoxybenzylidene)benzohydrazide monohydrate

N. Md. Lair, H. Md. Ali and S. W. Ng, *Acta Crystallogr., Sect. E: Cryst. Commun.*, 2009, **65**, o189, <https://doi.org/10.1107/S1600536808042888>

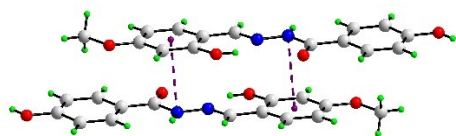

$d(\text{HN}\cdots\text{Cg}) = 3.42 \text{ \AA}$ ;  $\text{C}\cdots\text{C} = 3.37 \text{ \AA}$ ;  $\text{N}\cdots\text{C} = 3.42 \text{ \AA}$ ; dihedral angle  $\text{C}_2\text{N}_2\text{O}/\text{C}_6 = 2.6^\circ$ ;  
sum of angles about N(H) =  $360.0^\circ$

**a22. NEFTEY01** 3-nitrobenzaldehyde isonicotinoylhydrazone monohydrate

S. M. S. V. Wardell, J. L. Wardell, J. N. Low, C. Glidewell and M. V. N. de Souza, *Acta Crystallogr., Sect. C: Cryst. Struct. Chem.*, 2007, **63**, o42-o44, <https://doi.org/10.1107/S0108270106050451>

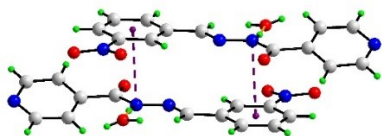

Determination at 120 K

$d(\text{HN}\cdots\text{Cg}) = 3.35 \text{ \AA}$ ;  $\text{C}\cdots\text{C} = 3.33 \text{ \AA}$ ;  $\text{N}\cdots\text{C} = 3.40 \text{ \AA}$ ; dihedral angle  $\text{C}_2\text{N}_2\text{O}/\text{C}_6 = 1.1^\circ$ ;  
sum of angles about  $\text{N}(\text{H}) = 360.0^\circ$

**a23. NUHSUH**  $\text{N}'\text{-}((2,2'\text{-bithiophen-5-yl)methylidene})\text{-3-hydroxybenzohydrazide}$

P. Yang, H. Chen, Z.-Z. Wang, L.-L. Zhang, D.-D. Zhang, Q.-S. Shi and X.-B. Xie, *J. Inorg. Biochem.*, 2020, **213**, 111248, <https://doi.org/10.1016/j.jinorgbio.2020.111248>

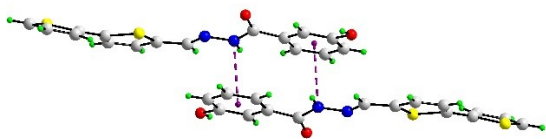

$d(\text{HN}\cdots\text{Cg}) = 3.31 \text{ \AA}$ ;  $\text{C}\cdots\text{C} = 3.58 \text{ \AA}$ ;  $\text{N}\cdots\text{C} = 3.23 \text{ \AA}$ ; dihedral angle  $\text{C}_2\text{N}_2\text{O}/\text{C}_6 = 14.0^\circ$ ;  
sum of angles about  $\text{N}(\text{H}) = 360.0^\circ$

**a24. PEPDIA**  $(\text{E})\text{-N}'\text{-}(3,5\text{-difluoro-2-hydroxybenzylidene})\text{isonicotinohydrazide}$

S. Mittapalli, D. S. Perumalla, J. B. Nanubolu and A. Nangia, *IUCrJ*, 2017, **4**, 812-823, <https://doi.org/10.1107/S2052252517014658>

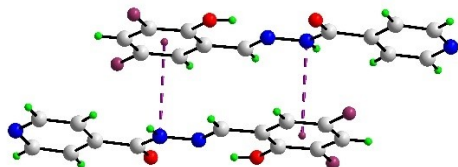

$d(\text{HN}\cdots\text{Cg}) = 3.39 \text{ \AA}$ ;  $\text{C}\cdots\text{C} = 3.32 \text{ \AA}$ ;  $\text{N}\cdots\text{C} = 3.39 \text{ \AA}$ ; dihedral angle  $\text{C}_2\text{N}_2\text{O}/\text{C}_6 = 2.3^\circ$ ;  
sum of angles about  $\text{N}(\text{H}) = 360.0^\circ$

**a25. QOTWUS**  $\text{N}'\text{-}(3,5\text{-dichloro-2-hydroxybenzylidene})\text{-1,3-benzodioxole-5-carbohydrazide}$   
methanol solvate

D.-X. Wu, J. Sun and M.-Z. Huang, *Z. Kristallogr. - New Cryst. Struct.*, 2009, **224**, 227-228, <https://doi.org/10.1524/ncrs.2009.0101>

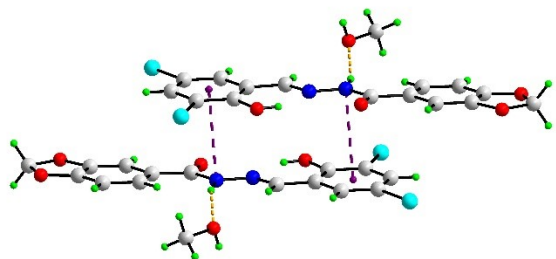

$d(\text{HN}\cdots\text{Cg}) = 3.38 \text{ \AA}$ ;  $\text{C}\cdots\text{C} = 3.44 \text{ \AA}$ ;  $\text{N}\cdots\text{C} = 3.36 \text{ \AA}$ ; dihedral angle  $\text{C}_2\text{N}_2\text{O}/\text{C}_6 = 3.7^\circ$ ;  
sum of angles about  $\text{N}(\text{H}) = 359.4^\circ$

**a26. RITFIK** 3,4-dihydroxy- $\text{N}'$ -(2-hydroxybenzylidene)benzohydrazide methanol solvate sesquihydrate

H.-B. Ma, S.-S. Huang and Y.-P. Diao, *Acta Crystallogr., Sect. E: Cryst. Commun.*, 2008, **64**, o210, <https://doi.org/10.1107/S1600536807065038>

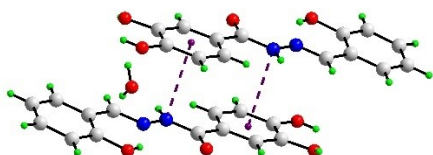

Two independent molecules – one self-associates into a dimer

$d(\text{HN}\cdots\text{Cg}) = 3.37 \text{ \AA}$ ;  $\text{C}\cdots\text{C} = 3.45 \text{ \AA}$ ;  $\text{N}\cdots\text{C} = 3.39 \text{ \AA}$ ; dihedral angle  $\text{C}_2\text{N}_2\text{O}/\text{C}_6 = 3.7^\circ$ ;  
sum of angles about  $\text{N}(\text{H}) = 359.9^\circ$

**a27. ROFMOP**  $\text{N}'$ -(3-bromo-5-chloro-2-hydroxybenzylidene)-4-hydroxybenzohydrazide

L.-W. Xue, Y.-J. Han, C.-J. Hao, G.-Q. Zhao and Q.-R. Liu, *Acta Crystallogr., Sect. E: Cryst. Commun.*, 2008, **64**, o1938, <https://doi.org/10.1107/S160053680802905X>

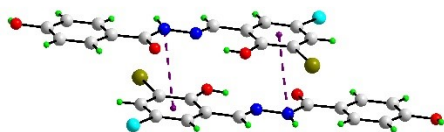

$d(\text{HN}\cdots\text{Cg}) = 3.44 \text{ \AA}$ ;  $\text{C}\cdots\text{C} = 3.40 \text{ \AA}$ ;  $\text{N}\cdots\text{C} = 3.46 \text{ \AA}$ ; dihedral angle  $\text{C}_2\text{N}_2\text{O}/\text{C}_6 = 1.5^\circ$ ;  
sum of angles about  $\text{N}(\text{H}) = 359.7^\circ$

**a28. TIMZAQ03** 2-nitrobenzaldehyde isonicotinoylhydrazone

S. M. S. V. Wardell, M. V. N. de Souza, J. L. Wardell, J. N. Low and C. Glidewell, *Acta Crystallogr., Sect. C: Struct. Chem.*, 2005, **61**, o683-o689, <https://doi.org/10.1107/S0108270105032580>

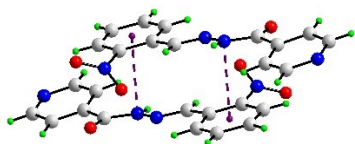

$d(\text{HN}\cdots\text{Cg}) = 3.42 \text{ \AA}$ ;  $\text{C}\cdots\text{C} = 3.23 \text{ \AA}$ ;  $\text{N}\cdots\text{C} = 3.37 \text{ \AA}$ ; dihedral angle  $\text{C}_2\text{N}_2\text{O}/\text{C}_6 = 8.8^\circ$ ;  
sum of angles about  $\text{N}(\text{H}) = 359.9^\circ$

**a29. WAFVEG**  $\text{N}'$ -(2,3-dihydroxybenzylidene)isonicotinohydrazide

E. Tecer, N. Dege, A. Zülfiyaroglu, N. Senyüz and H. Batil, *Acta Crystallogr., Sect. E: Cryst. Commun.*, 2010, **66**, o3369-o3370, <https://doi.org/10.1107/S1600536810048701>

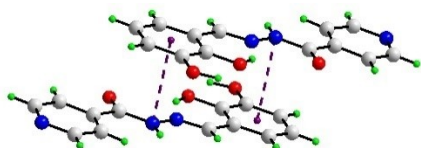

Two independent molecules, only one forms an interaction

$d(\text{HN}\cdots\text{Cg}) = 3.39 \text{ \AA}$ ;  $\text{C}\cdots\text{C} = 3.42 \text{ \AA}$ ;  $\text{N}\cdots\text{C} = 3.39 \text{ \AA}$ ; dihedral angle  $\text{C}_2\text{N}_2\text{O}/\text{C}_6 = 1.3^\circ$ ;  
sum of angles about  $\text{N}(\text{H}) = 359.9^\circ$

**a30. WOTZEN**  $\text{N}'$ -[(pyren-1-yl)methylidene]pyridine-4-carbohydrazide methanol solvate

L. Wang, *Z. Kristallogr. - New Cryst. Struct.*, 2019, **234**, 1249-1250, <https://doi.org/10.1515/ncrs-2019-0370>

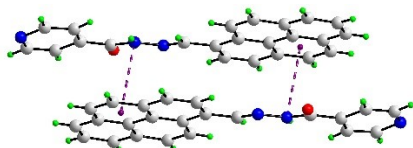

$d(\text{HN}\cdots\text{Cg}) = 3.37 \text{ \AA}$ ;  $\text{C}\cdots\text{C} = 3.51 \text{ \AA}$ ;  $\text{N}\cdots\text{C} = 3.45 \text{ \AA}$ ; dihedral angle  $\text{C}_2\text{N}_2\text{O}/\text{C}_6 = 9.8^\circ$ ;  
sum of angles about  $\text{N}(\text{H}) = 360.0^\circ$

**a31. XAZXON**  $\text{N}'$ -[(E)-3-chloro-2-fluorobenzylidene]-6-methylnicotinohydrazide monohydrate

H.-K. Fun, C. K. Quah, P. C. Shyma, B. Kalluraya and J. H. S. Vidyashree, *Acta Crystallogr., Sect. E: Cryst. Commun.*, 2012, **68**, o2122, <https://doi.org/10.1107/S1600536812026736>

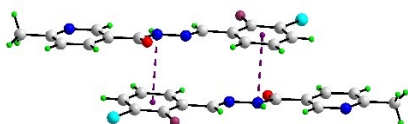

$d(\text{HN}\cdots\text{Cg}) = 3.36 \text{ \AA}$ ;  $\text{C}\cdots\text{C} = 3.51 \text{ \AA}$ ;  $\text{N}\cdots\text{C} = 3.45 \text{ \AA}$ ; dihedral angle  $\text{C}_2\text{N}_2\text{O}/\text{C}_6 = 10.6^\circ$ ;  
sum of angles about  $\text{N}(\text{H}) = 360.0^\circ$

**a32. YAGYAI** (E)-4-hydroxy-N'-(3,4,5-trimethoxybenzylidene)benzohydrazide

J. Horkaew, S. Chantrapromma and H.-K. Fun, *Acta Crystallogr., Sect. E: Cryst. Commun.*, 2011, **67**, o2985, <https://doi.org/10.1107/S1600536811041535>

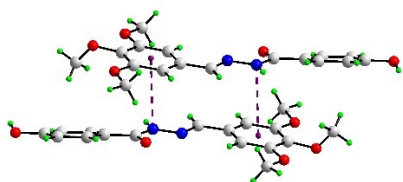

$d(\text{HN}\cdots\text{Cg}) = 3.45 \text{ \AA}$ ;  $\text{C}\cdots\text{C} = 3.44 \text{ \AA}$ ;  $\text{N}\cdots\text{C} = 3.37 \text{ \AA}$ ; dihedral angle  $\text{C}_2\text{N}_2\text{O}/\text{C}_6 = 8.5^\circ$ ;  
sum of angles about N(H) =  $360.0^\circ$

**a33. YIXNID** N'-(4-methoxybenzylidene)-4-nitrobenzohydrazide methanol solvate

Y.-Z. Wang, M.-D. Wang, Y.-P. Diao and Q. Cai, *Acta Crystallogr., Sect. E: Cryst. Commun.*, 2008, **64**, o668, <https://doi.org/10.1107/S1600536808005813>

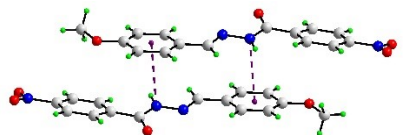

$d(\text{HN}\cdots\text{Cg}) = 3.40 \text{ \AA}$ ;  $\text{C}\cdots\text{C} = 3.62 \text{ \AA}$ ;  $\text{N}\cdots\text{C} = 3.47 \text{ \AA}$ ; dihedral angle  $\text{C}_2\text{N}_2\text{O}/\text{C}_6 = 13.3^\circ$ ;  
sum of angles about N(H) =  $360.0^\circ$

**a34. GINPOL** 2,3-dihydroxy-N',N'-bis[(2-hydroxyphenyl)methylidene]benzene-1,4-dicarbohydrazide

T. Kundu, J. Wang, Y. Cheng, Y. Du, Y. Qian, G. Liu and D. Zhao, *Dalton Trans.*, 2018, **47**, 13824-13829, <https://doi.org/10.1039/C8DT03005G>

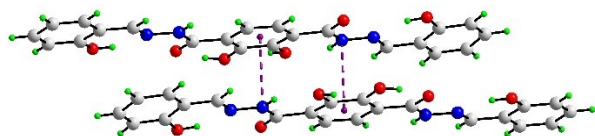

Two residues

$d(\text{HN}\cdots\text{Cg}) = 3.33 \text{ \AA}$ ;  $\text{C}\cdots\text{C} = 3.39 \text{ \AA}$ ;  $\text{N}\cdots\text{C} = 3.33 \text{ \AA}$ ; dihedral angle  $\text{C}_2\text{N}_2\text{O}/\text{C}_6 = 2.1^\circ$ ;  
sum of angles about N(H) =  $360.0^\circ$

**Linear chain:**

**a35. AVEZUY** N'-(5-bromo-2-hydroxy-3-methoxybenzylidene)-3-methylbenzohydrazide monohydrate

W.-M. Zhang, G.-H. Sheng and Z. You, *Asian J. Chem.*, 2014, **26**, 8118-8122,

<https://doi.org/10.14233/ajchem.2014.17602>

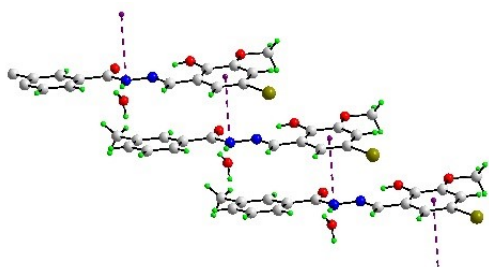

$d(\text{HN}\cdots\text{Cg}) = 3.42 \text{ \AA}$ ;  $\text{C}\cdots\text{C} = 3.55 \text{ \AA}$ ;  $\text{N}\cdots\text{C} = 3.43 \text{ \AA}$ ; dihedral angle  $\text{C}_2\text{N}_2\text{O}/\text{C}_6 = 6.4^\circ$ ;  
sum of angles about N(H) =  $360.0^\circ$

**a36. BESH0Z** N'-[[4-(diethylamino)-2-hydroxyphenyl]methylidene]-3-hydroxynaphthalene-2-carbohydrazide

M. Wu, D. Wang, J.-Q. Zheng, D.-C. Fang, L.-P. Jin and X.-J. Zheng, *Chem. Sel.*, 2018, **3**, 2174-2180,

<https://doi.org/10.1002/slct.201702611>

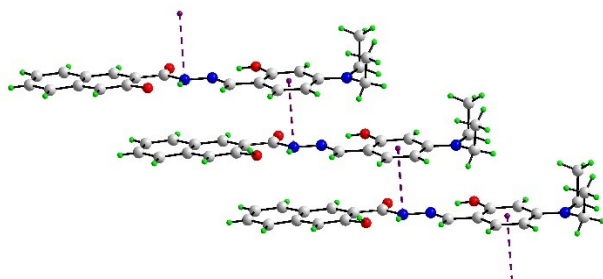

$d(\text{HN}\cdots\text{Cg}) = 3.35 \text{ \AA}$ ;  $\text{C}\cdots\text{C} = 3.40 \text{ \AA}$ ;  $\text{N}\cdots\text{C} = 3.42 \text{ \AA}$ ; dihedral angle  $\text{C}_2\text{N}_2\text{O}/\text{C}_6 = 5.7^\circ$ ;  
sum of angles about N(H) =  $360.0^\circ$

**a37. GITBAN** trans-2,4-dihydroxy-N'-(4-methoxybenzylidene)benzohydrazide

Y.-P. Diao, S.-S. Huang, J.-K. Zhang and T.-G. Kang, *Acta Crystallogr., Sect. E: Cryst. Commun.*, 2008, **64**,

o470, <https://doi.org/10.1107/S1600536808001104>



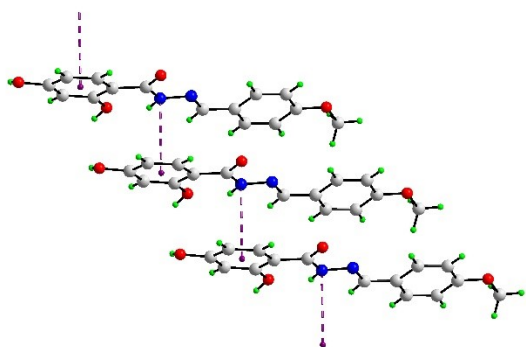

$d(\text{HN}\cdots\text{Cg}) = 3.43 \text{ \AA}$ ;  $\text{C}\cdots\text{C} = 3.54 \text{ \AA}$ ;  $\text{N}\cdots\text{C} = 3.59 \text{ \AA}$ ; dihedral angle  $\text{C}_2\text{N}_2\text{O}/\text{C}_6 = 9.5^\circ$ ;  
sum of angles about  $\text{N}(\text{H}) = 360.0^\circ$

**a38. HIGCUW** 2-pyridinecarbaldehyde-3'-hydroxybenzoyl hydrazone

P. V. Bernhardt, P. Chin, P. C. Sharpe and D. R. Richardson, *Dalton Trans.*, 2007, 3232-3244,

<https://doi.org/10.1039/b704102k>

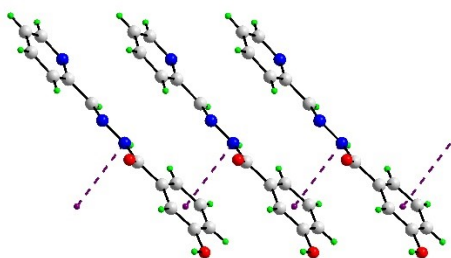

$d(\text{HN}\cdots\text{Cg}) = 3.37 \text{ \AA}$ ;  $\text{C}\cdots\text{C} = 3.57 \text{ \AA}$ ;  $\text{N}\cdots\text{C} = 3.43 \text{ \AA}$ ; dihedral angle  $\text{C}_2\text{N}_2\text{O}/\text{C}_6 = 13.3^\circ$ ;  
sum of angles about  $\text{N}(\text{H}) = 360.0^\circ$

**a39. HUGPOP** (E)-3-hydroxy-N'-(2-hydroxybenzylidene)-2-naphthohydrazide

H. H. Monfared, R. Bikas and P. Mayer, *Acta Crystallogr., Sect. E: Cryst. Commun.*, 2010, **66**, o236-o237,

<https://doi.org/10.1107/S1600536809053793>

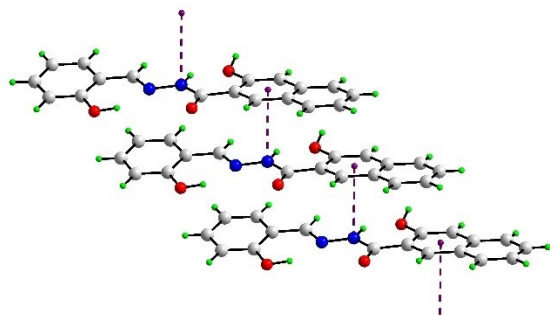

$d(\text{HN}\cdots\text{Cg}) = 3.30 \text{ \AA}$ ;  $\text{C}\cdots\text{C} = 3.42 \text{ \AA}$ ;  $\text{N}\cdots\text{C} = 3.39 \text{ \AA}$ ; dihedral angle  $\text{C}_2\text{N}_2\text{O}/\text{C}_6 = 7.3^\circ$ ;  
sum of angles about  $\text{N}(\text{H}) = 360.0^\circ$

**a40. IGAJOQ** N'-(2-furylmethylene)-2-hydroxybenzohydrazide

Y.-X. Zhang, *Acta Crystallogr., Sect. E: Cryst. Commun.*, 2008, **64**, o2208,

<https://doi.org/10.1107/S1600536808034636>

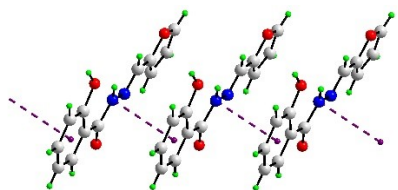

$d(\text{HN}\cdots\text{Cg}) = 3.41 \text{ \AA}$ ;  $\text{C}\cdots\text{C} = 3.53 \text{ \AA}$ ;  $\text{N}\cdots\text{C} = 3.44 \text{ \AA}$ ; dihedral angle  $\text{C}_2\text{N}_2\text{O}/\text{C}_6 = 5.6^\circ$ ;

sum of angles about N(H) =  $360.0^\circ$

**a41. JOFXOU** N'-[(3-ethoxy-2-hydroxyphenyl)methylidene]benzohydrazide monohydrate

M. C. Vineetha, M. Sithambaresan, Y. S. Nair, M. R. Prathapachandra Kurup, *Inorg. Chim. Acta*, 2019,

**419**, 93-104, <https://doi.org/10.1016/j.ica.2019.03.040>

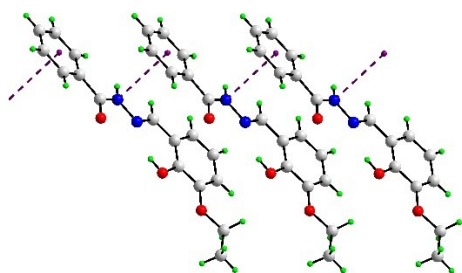

$d(\text{HN}\cdots\text{Cg}) = 3.43 \text{ \AA}$ ;  $\text{C}\cdots\text{C} = 3.86 \text{ \AA}$ ;  $\text{N}\cdots\text{C} = 3.77 \text{ \AA}$ ; dihedral angle  $\text{C}_2\text{N}_2\text{O}/\text{C}_6 = 7.7^\circ$ ;

sum of angles about N(H) =  $360.0^\circ$

**a42. JUQLOZ** N'1,N'3,N'5-tris[(2-hydroxy-4-methoxyphenyl)methylidene]benzene-1,3,5-tricarbohydrazide N,N-dimethylformamide solvate

P. Muthukumar, M. Surya, M. Pannipara, A. G. Al-Sehemi, D. Moon and S. P. Anthony, *Chem. Sel.*,

2020, **5**, 3295-3302, <https://doi.org/10.1002/slct.201904875>

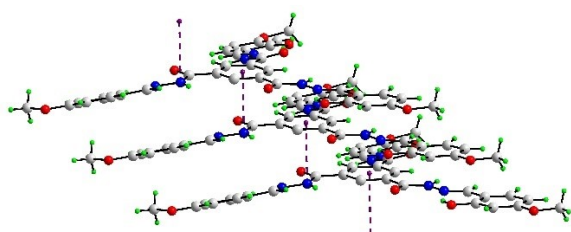

$d(\text{HN}\cdots\text{Cg}) = 3.33 \text{ \AA}$ ;  $\text{C}\cdots\text{C} = 3.30 \text{ \AA}$ ;  $\text{N}\cdots\text{C} = 3.48 \text{ \AA}$ ; dihedral angle  $\text{C}_2\text{N}_2\text{O}/\text{C}_6 = 3.4^\circ$ ;

sum of angles about N(H) =  $359.6^\circ$

**a43. KENNUO** N'-((2-hydroxy-1-naphthyl)methylene)-9H-b-carboline-3-carbohydrazide monohydrate

Y.-F. Sun, Z.-Y. Chen, Y.-L. Liu, N. Li, J.-K. Li and H.-C. Song, *Dyes Pigm.*, 2012, **95**, 512-522, <https://doi.org/10.1016/j.dyepig.2012.06.002>

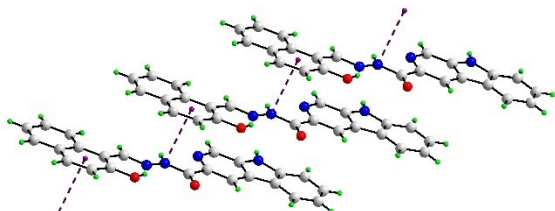

$d(\text{HN}\cdots\text{Cg}) = 3.44 \text{ \AA}$ ;  $\text{C}\cdots\text{C} = 3.53 \text{ \AA}$ ;  $\text{N}\cdots\text{C} = 3.43 \text{ \AA}$ ; dihedral angle  $\text{C}_2\text{N}_2\text{O}/\text{C}_6 = 4.0^\circ$ ;  
sum of angles about N(H) =  $360.0^\circ$

**a44. LEDVUN** N'-((2-hydroxy-1-naphthyl)methylene)-9H-b-carboline-3-carbohydrazide monohydrate

H. Kargar, R. Kia and M. N. Tahir, *Acta Crystallogr., Sect. E: Cryst. Commun.*, 2012, **68**, o2321-o2322, <https://doi.org/10.1107/S1600536812026633>

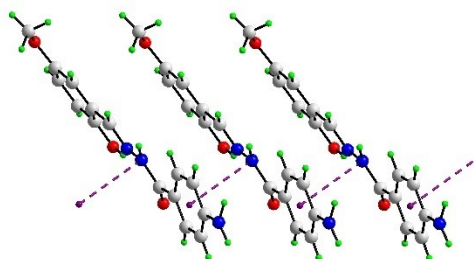

$d(\text{HN}\cdots\text{Cg}) = 3.42 \text{ \AA}$ ;  $\text{C}\cdots\text{C} = 3.77 \text{ \AA}$ ;  $\text{N}\cdots\text{C} = 3.46 \text{ \AA}$ ; dihedral angle  $\text{C}_2\text{N}_2\text{O}/\text{C}_6 = 17.7^\circ$ ;  
sum of angles about N(H) =  $359.9^\circ$

**a45. LUGXOD** (E)-N'-(2-hydroxy-4-methoxybenzylidene)-2-hydroxybenzohydrazide

P. Muthukumar, M. Surya, M. Pannipara, A. G. Al-Sehemi, D. Moon, S. P. Anthony, *Chem. Sel.*, 2020, **5**, 3295-3302, <https://doi.org/10.1002/slct.201904875>

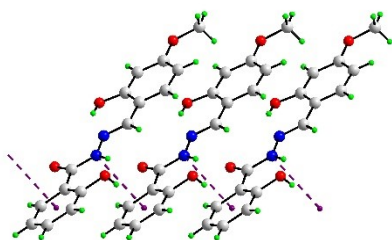

$d(\text{HN}\cdots\text{Cg}) = 3.45 \text{ \AA}$ ;  $\text{C}\cdots\text{C} = 3.55 \text{ \AA}$ ;  $\text{N}\cdots\text{C} = 3.55 \text{ \AA}$ ; dihedral angle  $\text{C}_2\text{N}_2\text{O}/\text{C}_6 = 8.4^\circ$ ;  
sum of angles about N(H) =  $360.0^\circ$

**a46. LUGXUJ** (E)-N'-(2-hydroxy-5-methoxybenzylidene)-2-hydroxybenzohydrazide

P. Muthukumar, M. Surya, M. Pannipara, A. G. Al-Sehemi, D. Moon, S. P. Anthony, *Chem. Sel.*, 2020, **5**, 3295-3302, <https://doi.org/10.1002/slct.201904875>

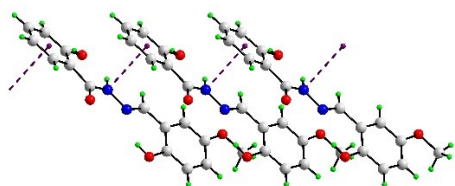

$d(\text{HN}\cdots\text{Cg}) = 3.39 \text{ \AA}$ ;  $\text{C}\cdots\text{C} = 3.53 \text{ \AA}$ ;  $\text{N}\cdots\text{C} = 3.48 \text{ \AA}$ ; dihedral angle  $\text{C}_2\text{N}_2\text{O}/\text{C}_6 = 9.0^\circ$ ;  
sum of angles about N(H) =  $360.0^\circ$

**a47. MEBLIP** 4-fluorobenzaldehyde (2-hydroxybenzoyl)hydrazone

Y. Zhang, S.-P. Zhang, Y.-Y. Wu and S.-C. Shao, *Acta Crystallogr., Sect. E: Cryst. Commun.*, 2006, **62**, o119-o120, <https://doi.org/10.1107/S1600536805040420>

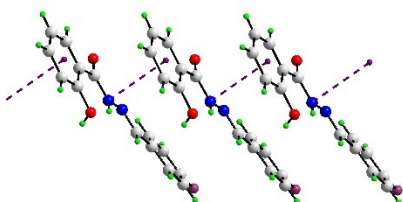

$d(\text{HN}\cdots\text{Cg}) = 3.39 \text{ \AA}$ ;  $\text{C}\cdots\text{C} = 3.48 \text{ \AA}$ ;  $\text{N}\cdots\text{C} = 3.46 \text{ \AA}$ ; dihedral angle  $\text{C}_2\text{N}_2\text{O}/\text{C}_6 = 5.1^\circ$ ;  
sum of angles about N(H) =  $360.0^\circ$

**a48. OCANOV** N-(E)-(2-stilbenyloxyacetyl) o-hydroxybenzaldehyde hydrazone

E. Wyrzykiewicz, A. Błaszczyk and I. Turowska-Tyrk, *Bull. Pol. Acad. Sci., Chem.*, 2000, **48**, 212-229.

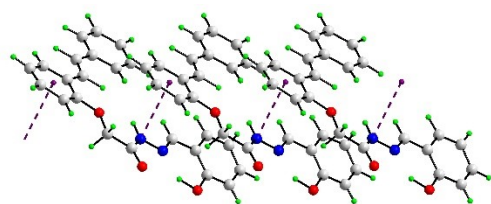

$d(\text{HN}\cdots\text{Cg}) = 3.36 \text{ \AA}$ ;  $\text{C}\cdots\text{C} = 3.60 \text{ \AA}$ ;  $\text{N}\cdots\text{C} = 3.39 \text{ \AA}$ ; dihedral angle  $\text{C}_2\text{N}_2\text{O}/\text{C}_6 = 9.4^\circ$ ;  
sum of angles about N(H) =  $359.5^\circ$

**a49. OCANUB** N-(E)-(2-(4'-chlorostilbenyl)oxyacetyl) m-hydroxybenzaldehyde hydrazone

E. Wyrzykiewicz, A. Błaszczyk and I. Turowska-Tyrk, *Bull. Pol. Acad. Sci., Chem.*, 2000, **48**, 212-229.

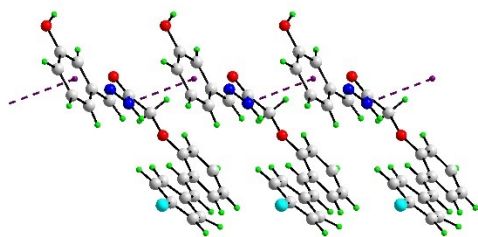

$d(\text{HN}\cdots\text{Cg}) = 3.38 \text{ \AA}$ ;  $\text{C}\cdots\text{C} = 3.68 \text{ \AA}$ ;  $\text{N}\cdots\text{C} = 3.45 \text{ \AA}$ ; dihedral angle  $\text{C}_2\text{N}_2\text{O}/\text{C}_6 = 17.3^\circ$ ;  
sum of angles about  $\text{N}(\text{H}) = 360.0^\circ$

**a50. ROGFEZ01** 4-hydroxy- $\text{N}'$ -(2-hydroxy-3-methoxybenzylidene)benzohydrazide monohydrate  
J. N. Low and J. L. Wardell, Private Communication to the Cambridge Structural Database, Refcode  
ROGFEZ01, 2018.

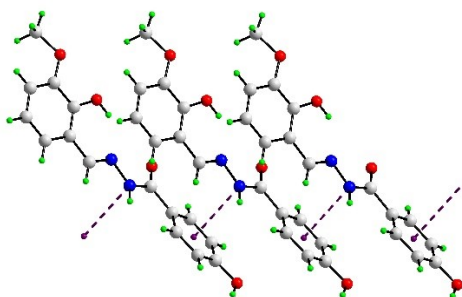

$d(\text{HN}\cdots\text{Cg}) = 3.44 \text{ \AA}$ ;  $\text{C}\cdots\text{C} = 3.71 \text{ \AA}$ ;  $\text{N}\cdots\text{C} = 3.65 \text{ \AA}$ ; dihedral angle  $\text{C}_2\text{N}_2\text{O}/\text{C}_6 = 15.1^\circ$ ;  
sum of angles about  $\text{N}(\text{H}) = 359.0^\circ$

**a51. WIWGOB**  $\text{N}'$ -[(2-phenyl-2H-1,2,3-triazol-4-yl)methylidene]pyridine-4-carbohydrazide dihydrate  
D. T. G. Gonzaga, F. C. da Silva, V. F. Ferreira, J. L. Wardell and S. M. S. V. Wardell, *J. Braz. Chem. Soc.*,  
2016, **27**, 2322-2333, <https://doi.org/10.5935/0103-5053.20160129>

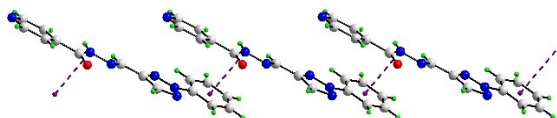

$d(\text{HN}\cdots\text{Cg}) = 3.36 \text{ \AA}$ ;  $\text{C}\cdots\text{C} = 3.54 \text{ \AA}$ ;  $\text{N}\cdots\text{C} = 3.37 \text{ \AA}$ ; dihedral angle  $\text{C}_2\text{N}_2\text{O}/\text{C}_6 = 3.7^\circ$ ;  
sum of angles about  $\text{N}(\text{H}) = 359.9^\circ$

**a52. WOFYUN**  $\text{N}'$ -[(4-methoxyphenyl)methylidene]-2-(5-phenyl-2H-tetrazol-2-yl)acetohydrazide  
N. Dege, N. Şenyüz, H. Bati, N. Günay, D. Avcı, Ö. Tamer and Y. Atalay, *Spectrochim. Acta Part A Mol. Biomol.*, 2014, **120**, 323-331, <https://doi.org/10.1016/j.saa.2013.10.030>

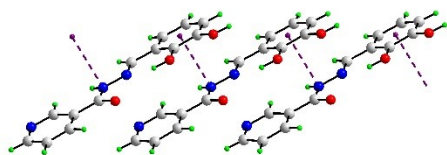

$d(\text{HN}\cdots\text{Cg}) = 3.39 \text{ \AA}$ ;  $\text{C}\cdots\text{C} = 3.35 \text{ \AA}$ ;  $\text{N}\cdots\text{C} = 3.49 \text{ \AA}$ ; dihedral angle  $\text{C}_2\text{N}_2\text{O}/\text{C}_6 = 4.6^\circ$ ;  
sum of angles about  $\text{N}(\text{H}) = 359.7^\circ$

**a53. WUQYEP** 3-hydroxy-*N'*-[(2-hydroxy-3-methoxyphenyl)methylidene]naphthalene-2-carbohydrazide

U. Saha, B. Das, M. Dolai, R. J. Butcher and G. S. Kumar, *ACS Omega*, 2020, **5**, 18411-18423,  
<https://doi.org/10.1021/acsomega.0c02226>

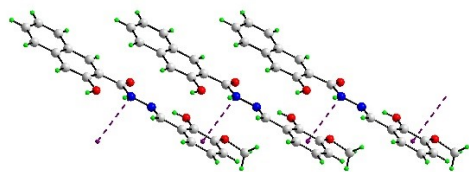

$d(\text{HN}\cdots\text{Cg}) = 3.40 \text{ \AA}$ ;  $\text{C}\cdots\text{C} = 3.37 \text{ \AA}$ ;  $\text{N}\cdots\text{C} = 3.43 \text{ \AA}$ ; dihedral angle  $\text{C}_2\text{N}_2\text{O}/\text{C}_6 = 1.7^\circ$ ;  
sum of angles about  $\text{N}(\text{H}) = 360.0^\circ$

**a54. WUQYEP01** 3-hydroxy-*N'*-[(2-hydroxy-3-methoxyphenyl)methylidene]naphthalene-2-carbohydrazide

M. W., D.-D. Yang, H.-W. Zheng, Q.-F. Liang, J.-B. Li, Y. Kang, S. Li, C. Jiao, X.-J. Zheng and L.-P. Jin,  
*Dalton Trans*, 2021, **50**, 1507-1513, <https://doi.org/10.1039/D0DT04062B>

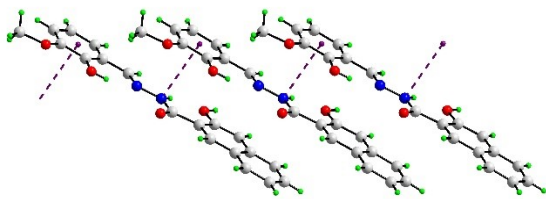

$d(\text{HN}\cdots\text{Cg}) = 3.36 \text{ \AA}$ ;  $\text{C}\cdots\text{C} = 3.28 \text{ \AA}$ ;  $\text{N}\cdots\text{C} = 3.41 \text{ \AA}$ ; dihedral angle  $\text{C}_2\text{N}_2\text{O}/\text{C}_6 = 2.5^\circ$ ;  
sum of angles about  $\text{N}(\text{H}) = 360.0^\circ$

**a55. ZOJSAV** *N'*-[[4-(diethylamino)-2-hydroxyphenyl]methylidene]-2-hydroxybenzohydrazide

V. Felix, Private Communication to the Cambridge Structural Database, Refcode ZOJSAV, 2019.

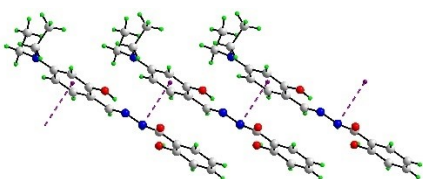

$d(\text{HN}\cdots\text{Cg}) = 3.26 \text{ \AA}$ ;  $\text{C}\cdots\text{C} = 3.35 \text{ \AA}$ ;  $\text{N}\cdots\text{C} = 3.36 \text{ \AA}$ ; dihedral angle  $\text{C}_2\text{N}_2\text{O}/\text{C}_6 = 8.5^\circ$ ;  
sum of angles about  $\text{N}(\text{H}) = 360.0^\circ$

**a56. NEQOOQ** bis(2-hydroxy-1-naphthaldehyde) oxaloyldihydrazone dihydrate

L.-N. Zhu, C.-Q. Li, X.-Z. Li and R. Li, *Acta Crystallogr., Sect. E: Cryst. Commun.*, 2006, **62**, o4603-o4605,  
<https://doi.org/10.1107/S1600536806037615>

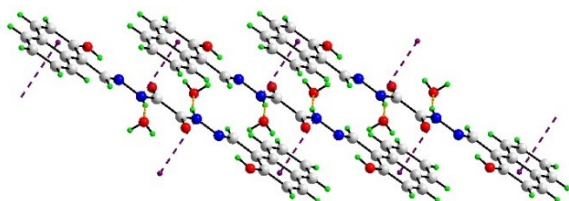

Centrosymmetric molecule: two interactions per molecule

$d(\text{HN}\cdots\text{Cg}) = 3.32 \text{ \AA}$ ;  $\text{C}\cdots\text{C} = 3.29 \text{ \AA}$ ;  $\text{N}\cdots\text{C} = 3.30 \text{ \AA}$ ; dihedral angle  $\text{C}_2\text{N}_2\text{O}/\text{C}_6 = 0.8^\circ$ ;  
sum of angles about  $\text{N}(\text{H}) = 360.0^\circ$

**a57. IHIPEx** N'1,N'4-dibenzylidenebenzene-1,4-dicarbohydrazide dihydrate

X. Li, J. Qiao, S. W. Chee, H.-S. Xu, X. Zhao, H. S. Choi, W. Yu, S. Y. Quek, U. Mirsaidov and K. P. Loh, *J. Am. Chem. Soc.*, 2020, **142**, 4932-4943, <https://doi.org/10.1021/jacs.0c00553>

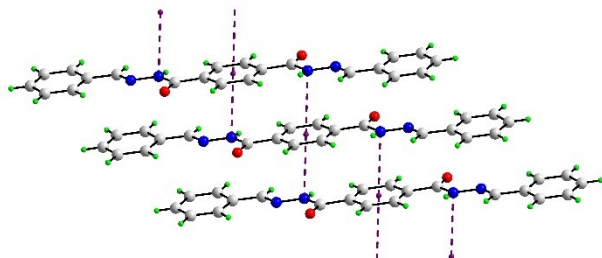

The molecule is centred around an inversion centre; each ring forms two contacts

$d(\text{HN}\cdots\text{Cg}) = 3.38 \text{ \AA}$ ;  $\text{C}\cdots\text{C} = 3.39 \text{ \AA}$ ;  $\text{N}\cdots\text{C} = 3.34 \text{ \AA}$ ; dihedral angle  $\text{C}_2\text{N}_2\text{O}/\text{C}_6 = 1.0^\circ$ ;  
sum of angles about  $\text{N}(\text{H}) = 359.4^\circ$

**Linear chains also featuring conventional hydrogen bonding:**

**a58. BOLFUG** N'-[(2H-1,3-benzodioxol-5-yl)methylidene]benzohydrazide methanol solvate monohydrate

V. Arumugam, C. Shalini, N. Dharmaraj, W. Kaminsky and R. Karvembu, *Eur. J. Inorg. Chem.*, 2019, 3869-3882, <https://doi.org/10.1002/ejic.201900781>



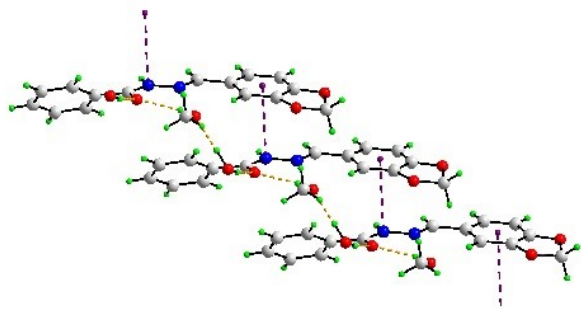

$d(\text{HN}\cdots\text{Cg}) = 3.40 \text{ \AA}$ ;  $\text{C}\cdots\text{C} = 3.44 \text{ \AA}$ ;  $\text{N}\cdots\text{C} = 3.28 \text{ \AA}$ ; dihedral angle  $\text{C}_2\text{N}_2\text{O}/\text{C}_6 = 8.0^\circ$ ;  
sum of angles about  $\text{N}(\text{H}) = 360.0^\circ$

**a59. CIQVAA** N'-(4-(dimethylamino)benzylidene)-3,5-dihydroxybenzohydrazide monohydrate  
Y.-P. Diao, J.-K. Zhang, S.-Q. Xie and T.-G. Kang, *Acta Crystallogr., Sect. E: Cryst. Commun.*, 2007, **63**,  
o4908, <https://doi.org/10.1107/S1600536807061132>

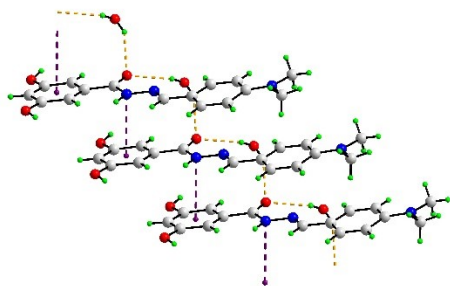

$d(\text{HN}\cdots\text{Cg}) = 3.38 \text{ \AA}$ ;  $\text{C}\cdots\text{C} = 3.50 \text{ \AA}$ ;  $\text{N}\cdots\text{C} = 3.39 \text{ \AA}$ ; dihedral angle  $\text{C}_2\text{N}_2\text{O}/\text{C}_6 = 4.6^\circ$ ;  
sum of angles about  $\text{N}(\text{H}) = 360.0^\circ$

**a60. COGQEW** (E)-4-chloro-N'-(2-chlorobenzylidene)benzohydrazide monohydrate  
J. T. Mague, S. K. Mohamed, M. Akkurt, H. Potgieter and M. R. Albayati, *Acta Crystallogr., Sect. E:*  
*Cryst. Commun.*, 2014, **70**, o612, <https://doi.org/10.1107/S1600536814008885>

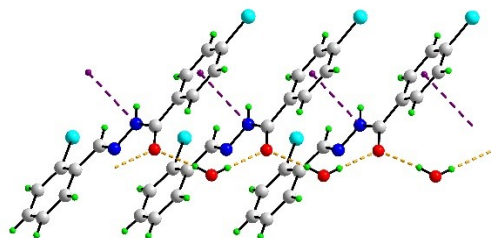

$d(\text{HN}\cdots\text{Cg}) = 3.44 \text{ \AA}$ ;  $\text{C}\cdots\text{C} = 3.75 \text{ \AA}$ ;  $\text{N}\cdots\text{C} = 3.43 \text{ \AA}$ ; dihedral angle  $\text{C}_2\text{N}_2\text{O}/\text{C}_6 = 14.7^\circ$ ;  
sum of angles about  $\text{N}(\text{H}) = 360.0^\circ$



**a61. MOKHIE** N'-(2-hydroxy-3-methoxybenzylidene)-1,3-benzodioxole-5-carbohydrazide monohydrate

C.-L. Du, *Acta Crystallogr., Sect. E: Cryst. Commun.*, 2009 **65**, o29,

<https://doi.org/10.1107/S1600536808040117>

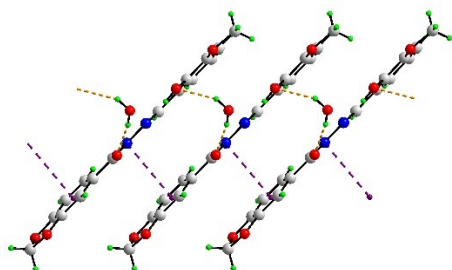

$d(\text{HN}\cdots\text{Cg}) = 3.45 \text{ \AA}$ ;  $\text{C}\cdots\text{C} = 3.59 \text{ \AA}$ ;  $\text{N}\cdots\text{C} = 3.47 \text{ \AA}$ ; dihedral angle  $\text{C}_2\text{N}_2\text{O}/\text{C}_6 = 7.4^\circ$ ;  
sum of angles about N(H) =  $360.0^\circ$

**a62. QAPHAS** 4-chloro-N'-(4-hydroxy-3-nitrobenzylidene)benzohydrazide monohydrate

Y. Lei, T.-Z. Li, C. Fu, X.-L. Guan and Y. Tan, *J. Chem. Crystallogr.*, 2011, **41**, 1707,

<https://doi.org/10.1007/s10870-011-0161-0>

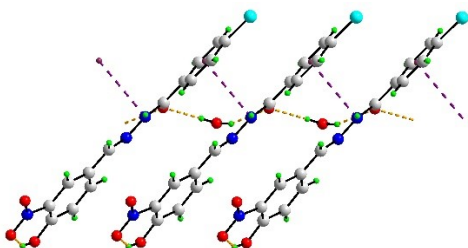

$d(\text{HN}\cdots\text{Cg}) = 3.32 \text{ \AA}$ ;  $\text{C}\cdots\text{C} = 3.63 \text{ \AA}$ ;  $\text{N}\cdots\text{C} = 3.40 \text{ \AA}$ ; dihedral angle  $\text{C}_2\text{N}_2\text{O}/\text{C}_6 = 15.3^\circ$ ;  
sum of angles about N(H) =  $359.7^\circ$

**a63. SEDTUS** 3-bromo-N'-(5-bromo-2-hydroxy-3-methoxybenzylidene)benzohydrazide monohydrate

H.-Y. Zhu, *Asian J. Chem.*, 2012, **24**, 558-560.

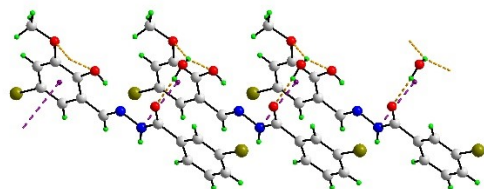

$d(\text{HN}\cdots\text{Cg}) = 3.45 \text{ \AA}$ ;  $\text{C}\cdots\text{C} = 3.55 \text{ \AA}$ ;  $\text{N}\cdots\text{C} = 3.44 \text{ \AA}$ ; dihedral angle  $\text{C}_2\text{N}_2\text{O}/\text{C}_6 = 4.3^\circ$ ;  
sum of angles about N(H) =  $358.5^\circ$

**a64. TEZMER** N'-[(2-hydroxy-3-methoxyphenyl)methylidene]benzohydrazide monohydrate

O. Pouralimardan, A.-C. Chamayou, C. Janiak and H. Hosseini-Monfared, *Inorg. Chim. Acta*, 2007, **360**, 1599-1608, <https://doi.org/10.1016/j.ica.2006.08.056>

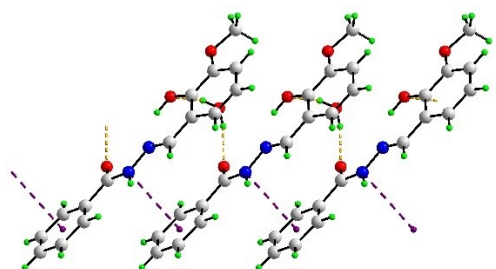

$d(\text{HN}\cdots\text{Cg}) = 3.41 \text{ \AA}$ ;  $\text{C}\cdots\text{C} = 3.40 \text{ \AA}$ ;  $\text{N}\cdots\text{C} = 3.53 \text{ \AA}$ ; dihedral angle  $\text{C}_2\text{N}_2\text{O}/\text{C}_6 = 3.1^\circ$ ;  
sum of angles about N(H) =  $359.9^\circ$

**a65. XAZHUD** (E)-N'-(5-bromo-2-hydroxy-3-methoxybenzylidene)-2-hydroxybenzohydrazide monohydrate

S. Zhao, L. Li, X. Liu, W. Feng and X. Lu, *Acta Crystallogr., Sect. E: Cryst. Commun.*, 2012, **68**, o2040, <https://doi.org/10.1107/S1600536812024816>

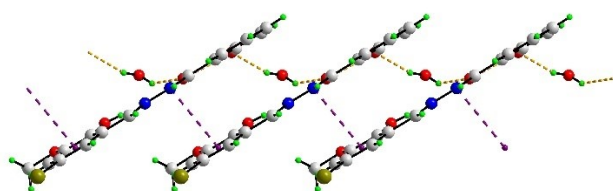

$d(\text{HN}\cdots\text{Cg}) = 3.42 \text{ \AA}$ ;  $\text{C}\cdots\text{C} = 3.35 \text{ \AA}$ ;  $\text{N}\cdots\text{C} = 3.42 \text{ \AA}$ ; dihedral angle  $\text{C}_2\text{N}_2\text{O}/\text{C}_6 = 4.6^\circ$ ;  
sum of angles about N(H) =  $360.0^\circ$

**a66. ZOZMAF** N'-[(1-chloro-3,4-dihydronaphthalen-2-yl)methylidene]benzohydrazide monohydrate

H. A. Arjun, G. N. Anil Kumar, R. Elancheran and S. Kabilan, *Acta Crystallogr., Sect. E: Cryst. Commun.*, 2020, **76**, 132-136, <https://doi.org/10.1107/S1600536808005813>

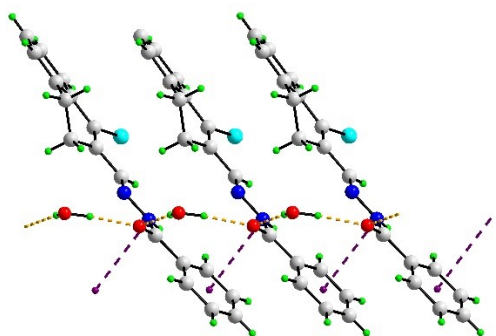

$d(\text{HN}\cdots\text{Cg}) = 3.43 \text{ \AA}$ ;  $\text{C}\cdots\text{C} = 3.64 \text{ \AA}$ ;  $\text{N}\cdots\text{C} = 3.50 \text{ \AA}$ ; dihedral angle  $\text{C}_2\text{N}_2\text{O}/\text{C}_6 = 11.1^\circ$ ;  
sum of angles about N(H) =  $359.7^\circ$

**Zigzag chain:**

**a67. GEKCOQ** 4-hydroxy-N'-((2-methoxy-1-naphthyl)methylidene)benzohydrazide methanol solvate

Y.-J. Wei and E.-W. Wang, *J. Struct. Chem.*, 2011, **52**, 775, <https://doi.org/10.1134/S0022476611040160>

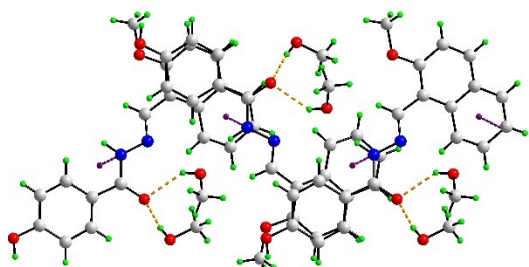

$d(\text{HN}\cdots\text{Cg}) = 3.43 \text{ \AA}$ ;  $\text{C}\cdots\text{C} = 3.59 \text{ \AA}$ ;  $\text{N}\cdots\text{C} = 3.56 \text{ \AA}$ ; dihedral angle  $\text{C}_2\text{N}_2\text{O}/\text{C}_6 = 11.5^\circ$ ;

sum of angles about  $\text{N}(\text{H}) = 359.8^\circ$
